# Supplementary material
Source: PubMed Central journal article supplement (PMC3966078)
Supplement: NIHMS561762-supplement-1.pdf [file NIHMS561762-supplement-1.pdf]

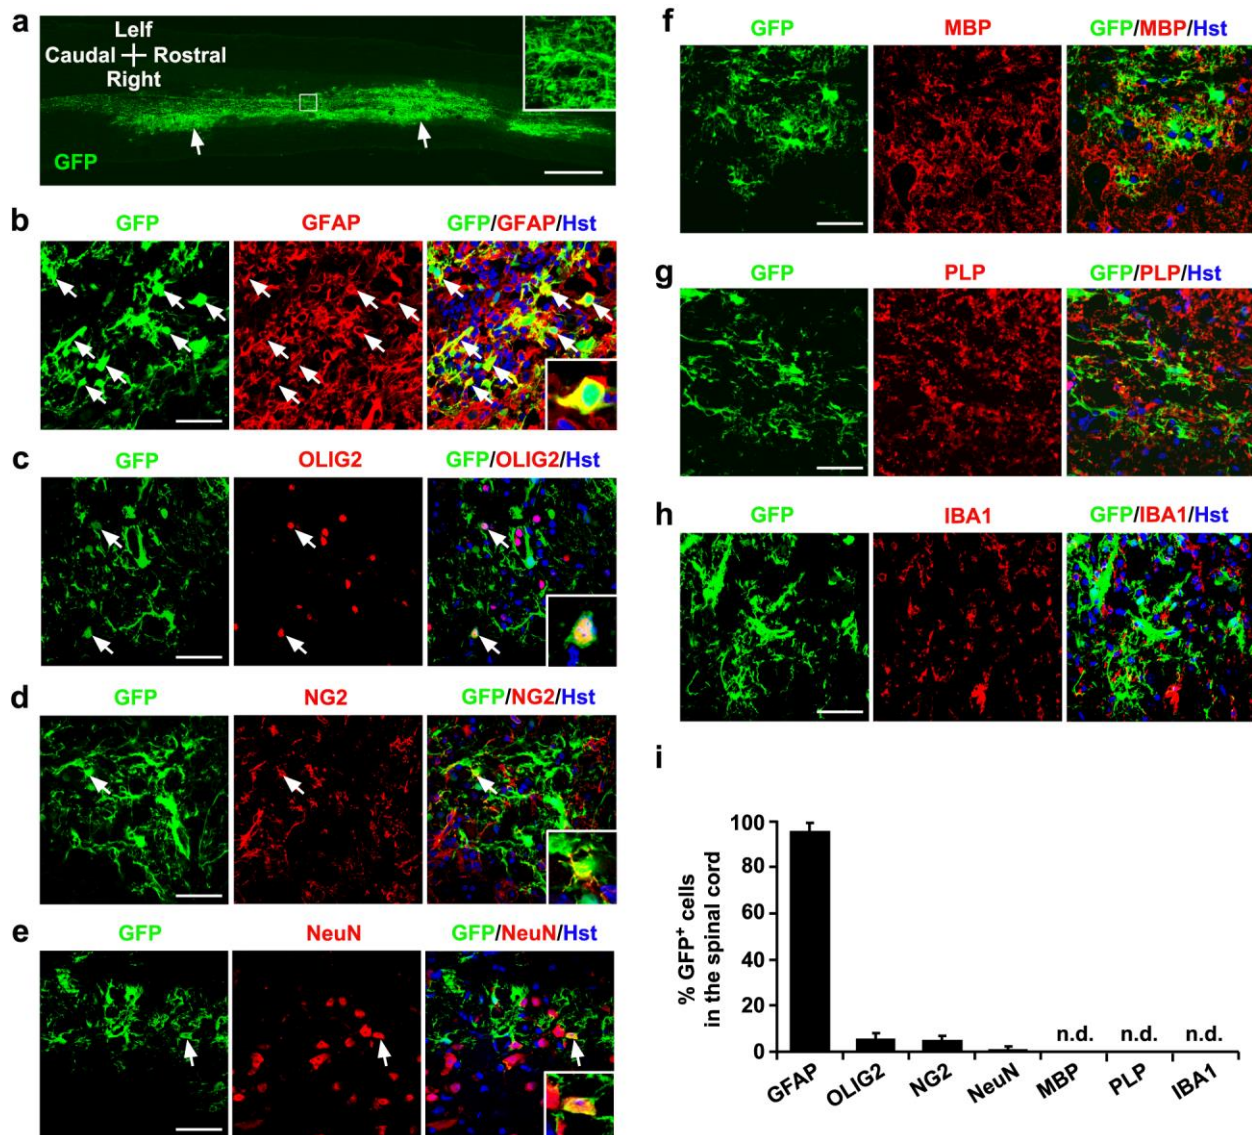

**Supplementary Figure 1. Lentivirus under the *hGFAP* promoter drives gene expression mainly in spinal astrocytes.** (a) A lower magnification view of a longitudinal section from the adult spinal cord injected with *hGFAP-GFP* at 1 wpi. Arrows show sites injected with lentivirus. Scale: 1 mm. (b-h) Confocal analyses of GFP<sup>+</sup> cells in the spinal cord. Nuclei were counterstained with Hoechst 33342 (Hst). Arrows show co-localization of GFP<sup>+</sup> cells with the indicated markers. Scales: 50 μm. (i) Quantification of marker expression in GFP<sup>+</sup> cells (mean ± SD, n=3). At least 500 GFP<sup>+</sup> cells were analyzed for each marker. n.d., not detected.

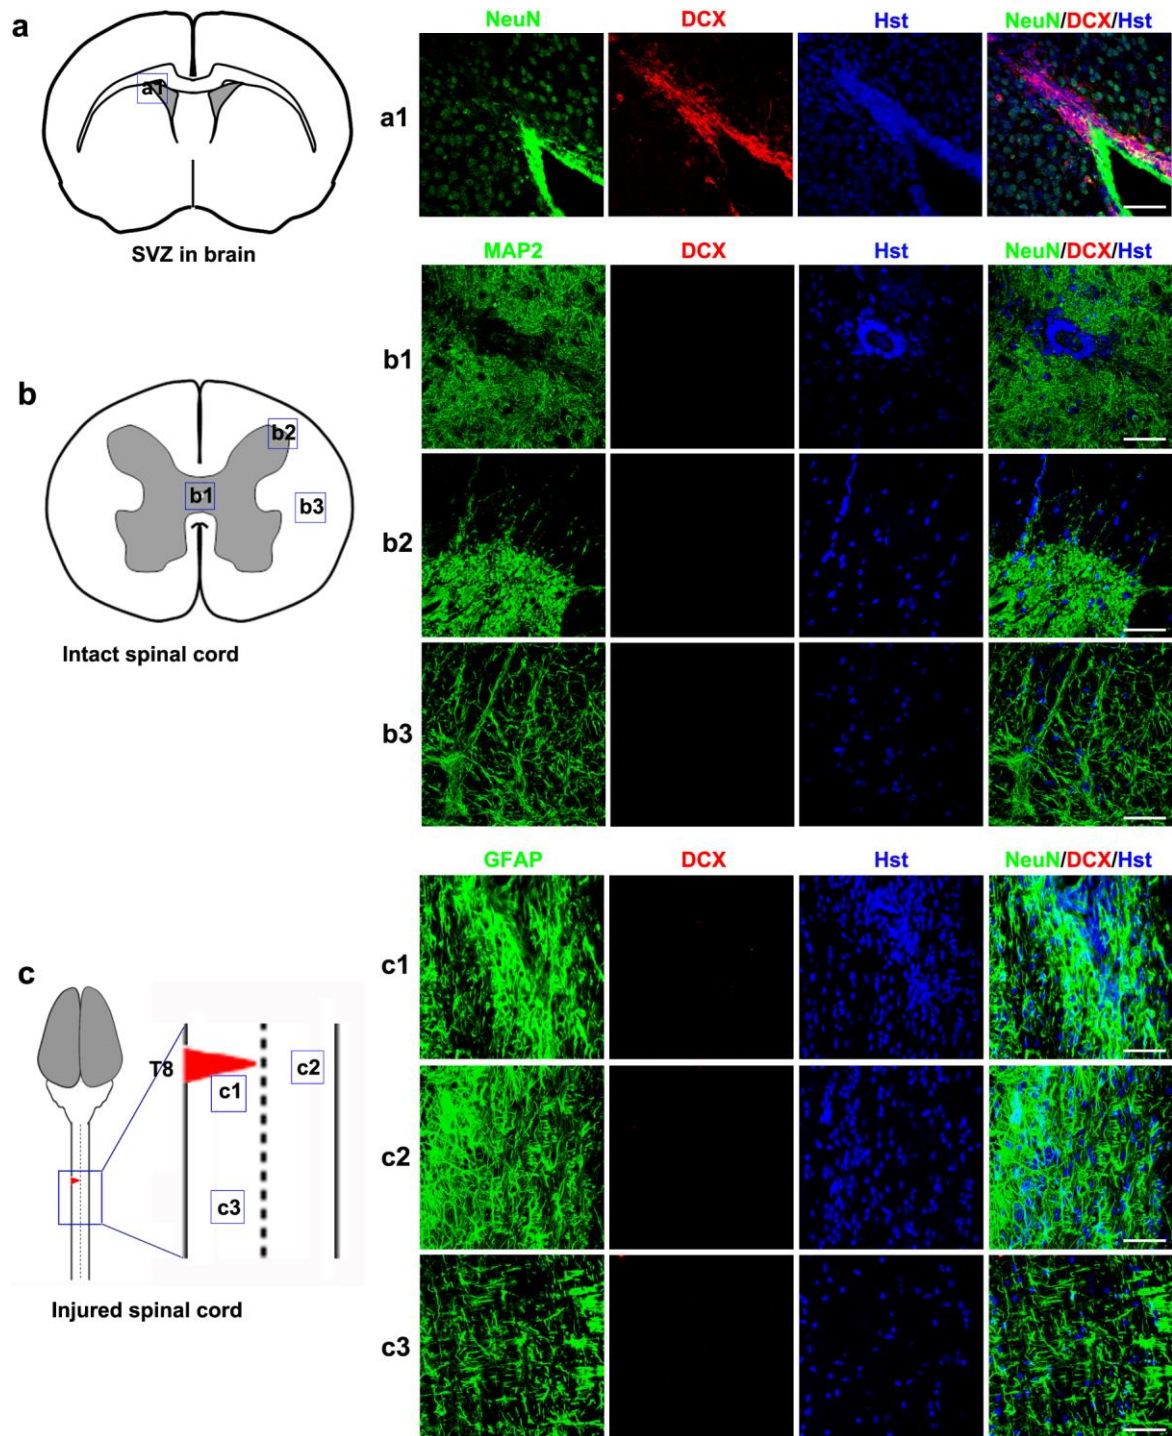

**Supplementary Figure 2. DCX<sup>+</sup> cells are absent in the adult spinal cord with or without lesions.**

Schematic diagrams on the left panels show positions in the brain or spinal cord in which cells were analyzed by IHC. **(a)** DCX<sup>+</sup> cells in the subventricular zone (SVZ) of the adult brain serve as positive controls. **(b-c)** DCX<sup>+</sup> cells are not detectable in either the intact **(b)** or hemisectioned **(c)** spinal cord. The hemisection site at the thoracic 8 (T8) level of the adult spinal cord is indicated by an arrowhead. Scales: 50  $\mu$ m.

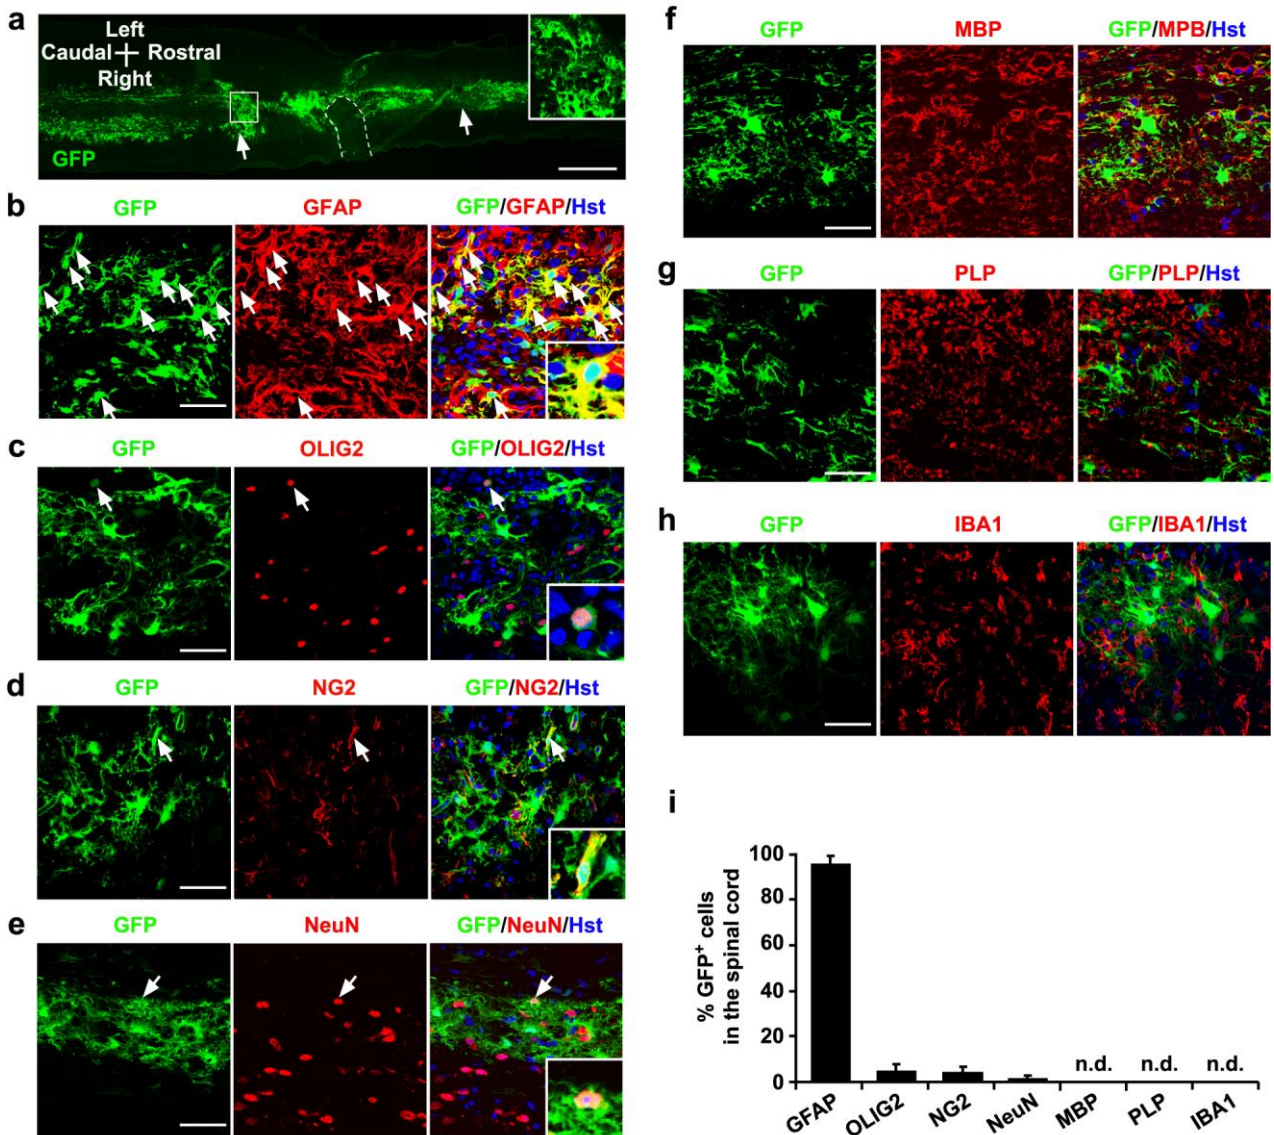

**Supplementary Figure 3. Astrocytes are the main cell types targeted by *hGFAP* lentivirus in the injured adult spinal cord.** (a) A lower magnification view of a longitudinal section from the injured adult spinal cord injected with *hGFAP-GFP* lentivirus at 1 wpi. Arrows show the viral injection sites. The area with hemisection-induced lesions is outlined with a dashed line. Scale: 1 mm. (b-h) Confocal analyses of GFP<sup>+</sup> cells in the spinal cord. Nuclei were counterstained with Hst. Arrows show co-localization of GFP<sup>+</sup> cells with the indicated markers. Scales: 50  $\mu$ m. (i) Quantification of marker expression in GFP<sup>+</sup> cells (mean  $\pm$  SD, n=3). At least 500 GFP<sup>+</sup> cells were analyzed for each marker. n.d., not detected.

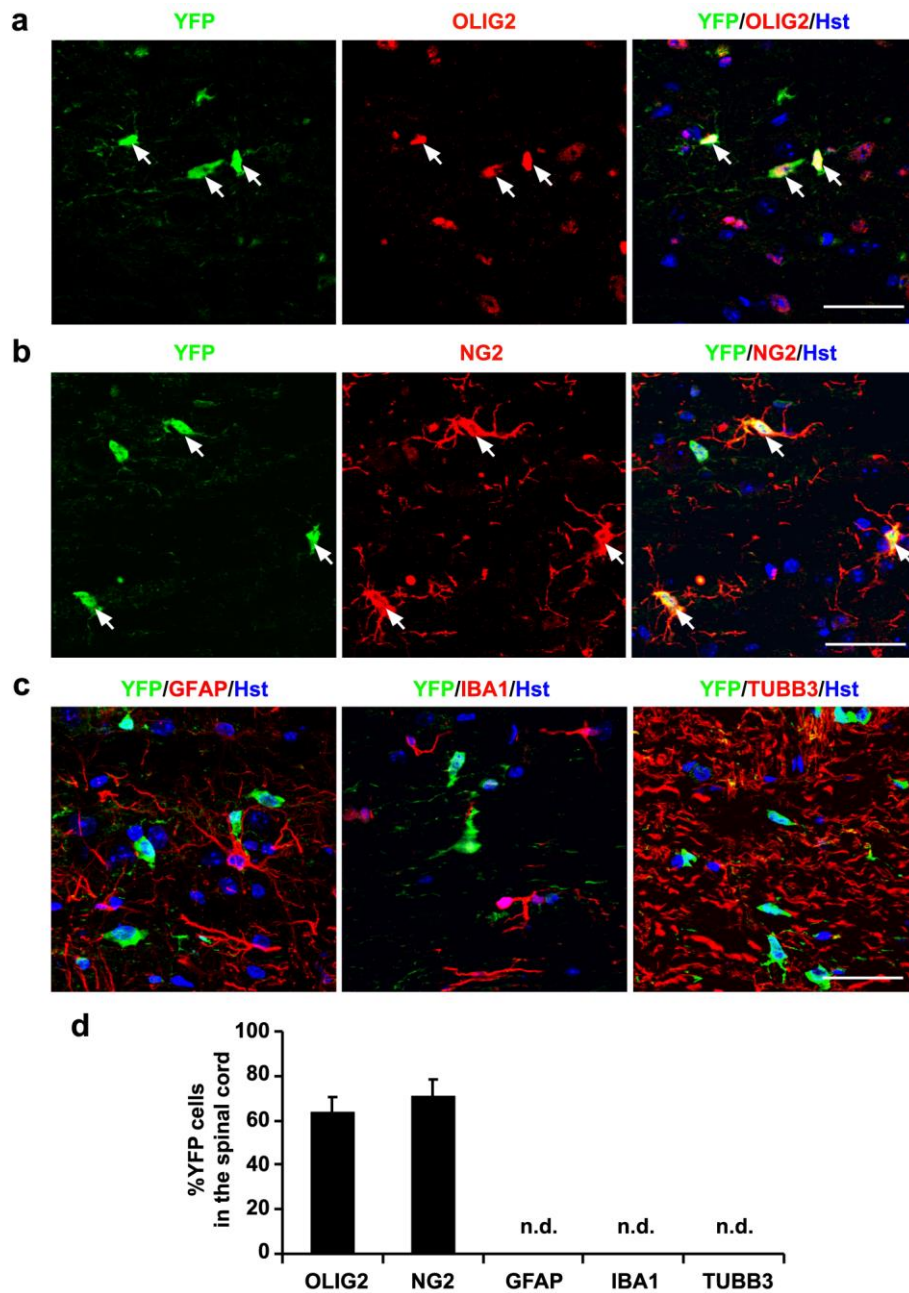

**Supplementary Figure 4. Genetic tracing of NG2 cells in the adult spinal cord of *Ng2-Cre; Rosa-YFP* mice. (a-c)** Confocal analyses of YFP<sup>+</sup> cells. Arrows show YFP<sup>+</sup> cells co-labeled with the indicated markers. Nuclei were counterstained with Hst. Scales: 40  $\mu$ m. **(d)** Quantification of marker expression in YFP<sup>+</sup> cells (mean  $\pm$  SD, n=3). At least 100 YFP<sup>+</sup> cells were analyzed for each marker. n.d., not detected.

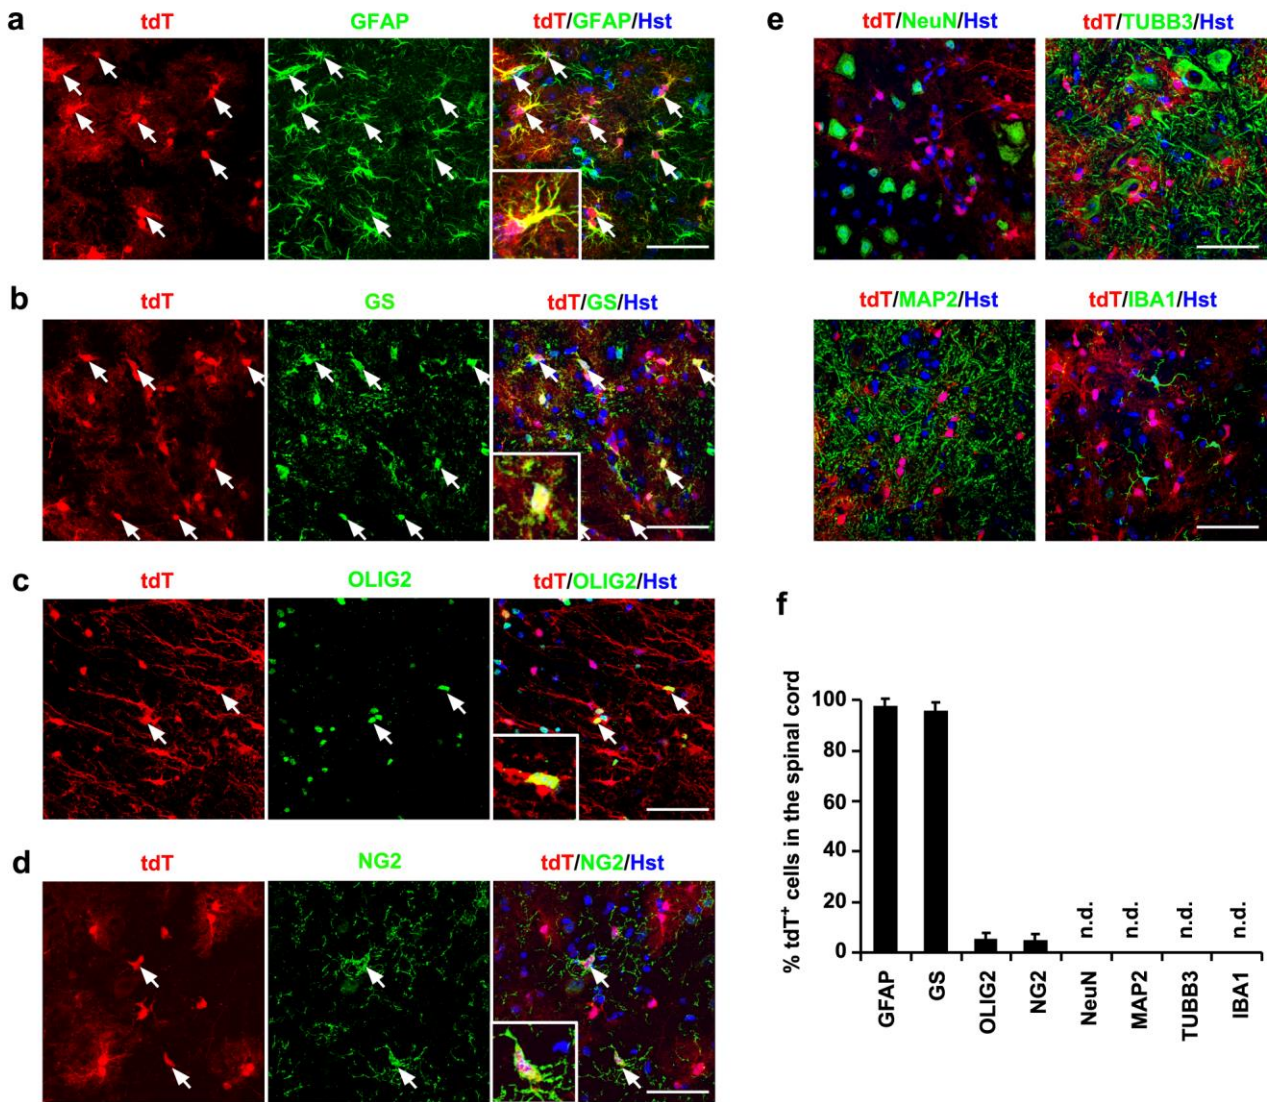

**Supplementary Figure 5. Glial cells but not neurons are traced in the spinal cord of *mGfap-Cre line 77.6;Rosa-tdT* mice. (a-e)** Confocal analyses of tdT-positive cells. Nuclei were counterstained with Hst. Arrows show tdT<sup>+</sup> cells co-labeled with the indicated markers. Scales: 50  $\mu$ m. **(f)** Quantification of marker expression in tdT<sup>+</sup> cells (mean  $\pm$  SD, n=4). At least 400 tdT<sup>+</sup> cells were analyzed for each marker. n.d., not detected.

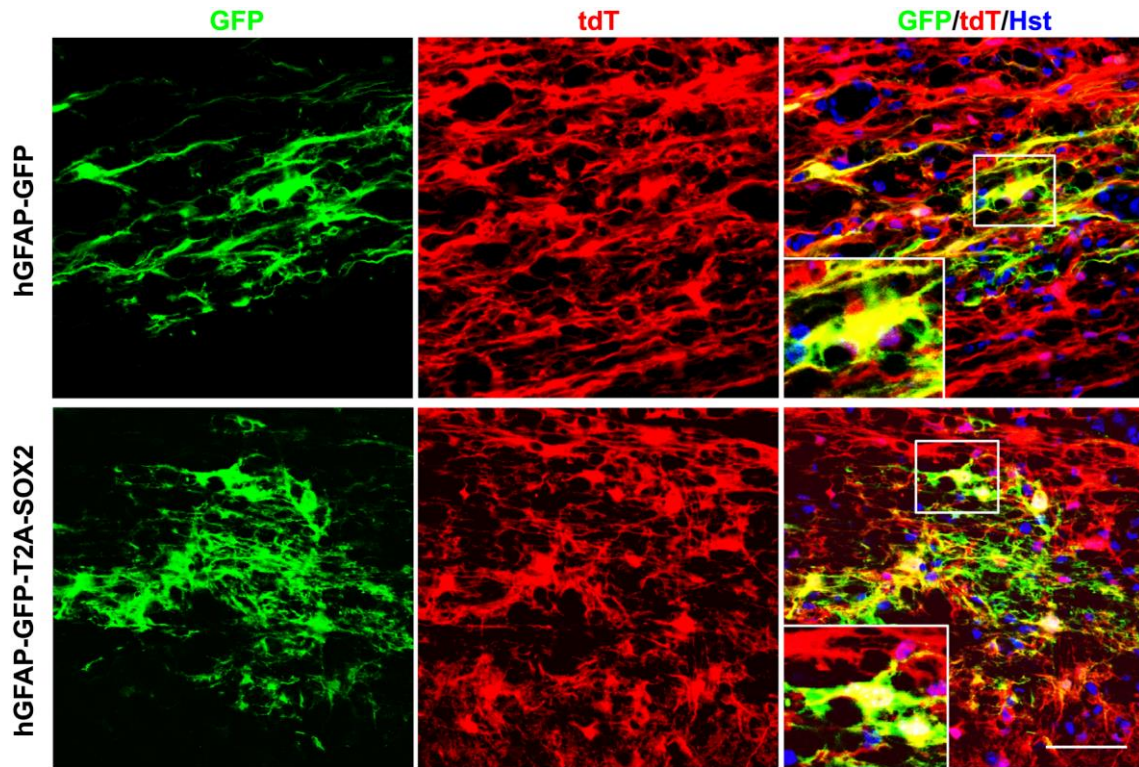

**Supplementary Figure 6. Targeting tdT-traced astrocytes by lentivirus under the hGFAP promoter in the spinal cord of *mGfap-Cre line 77.6;Rosa-tdT* mice.** Mice were injected with lentivirus expressing *hGFAP-GFP* or *hGFAP-GFP-T2A-SOX2* and analyzed at 1 wpi. Scales: 50  $\mu$ m.

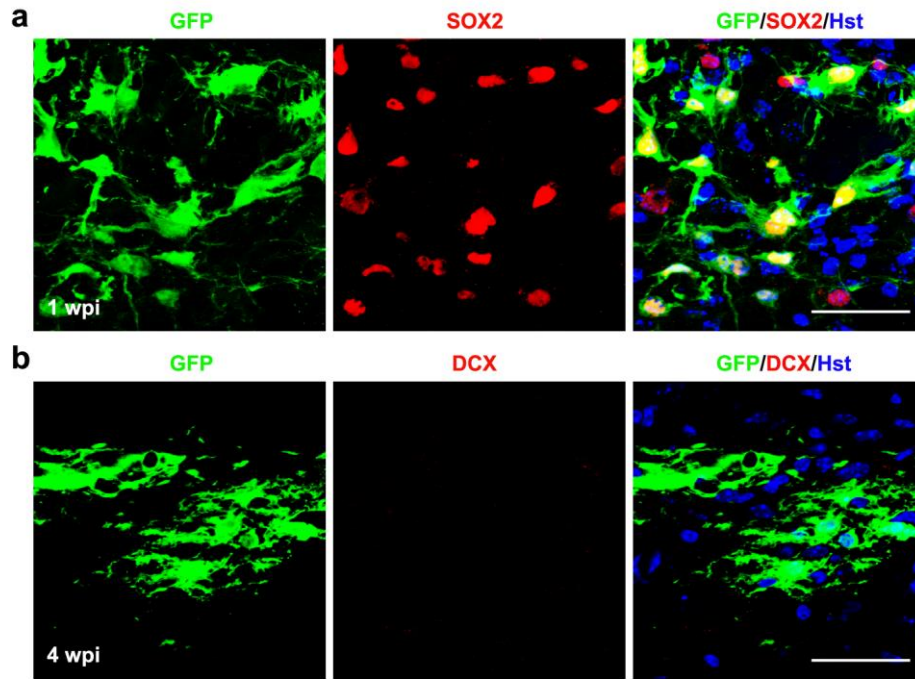

**Supplementary Figure 7. Constitutive expression of SOX2 prohibits induction of DCX<sup>+</sup> cells.** (a) Robust expression of SOX2 under the constitutively active CAG promoter. (b) No DCX<sup>+</sup> cells were detected in the spinal cord 4 weeks post viral injection. Scales: 40  $\mu$ m.

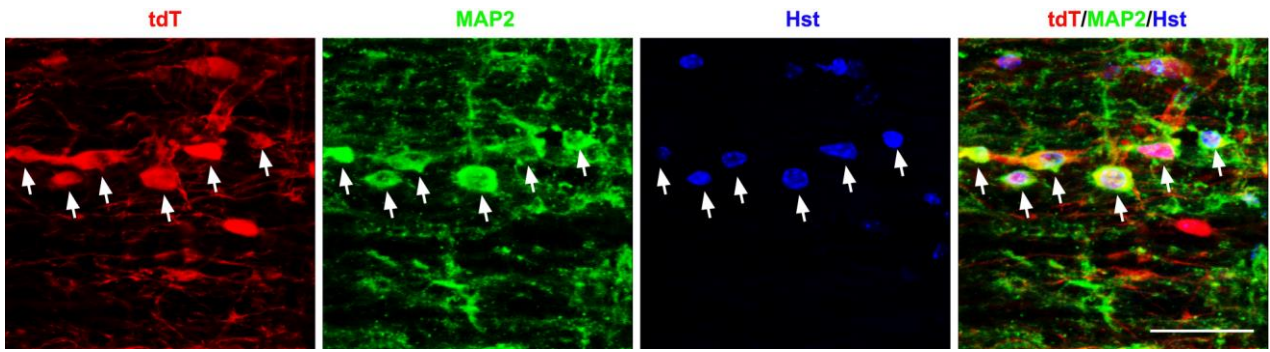

**Supplementary Figure 8. Long-term survival of astrocyte-derived neurons in the adult spinal cord.** *mGfap-Cre;Rosa-tdT* mice were injected with SOX2-expressing lentivirus, treated with VPA, and analyzed at 30 wpi. Arrows indicate astrocytes-converted neurons. Scale: 40  $\mu$ m.



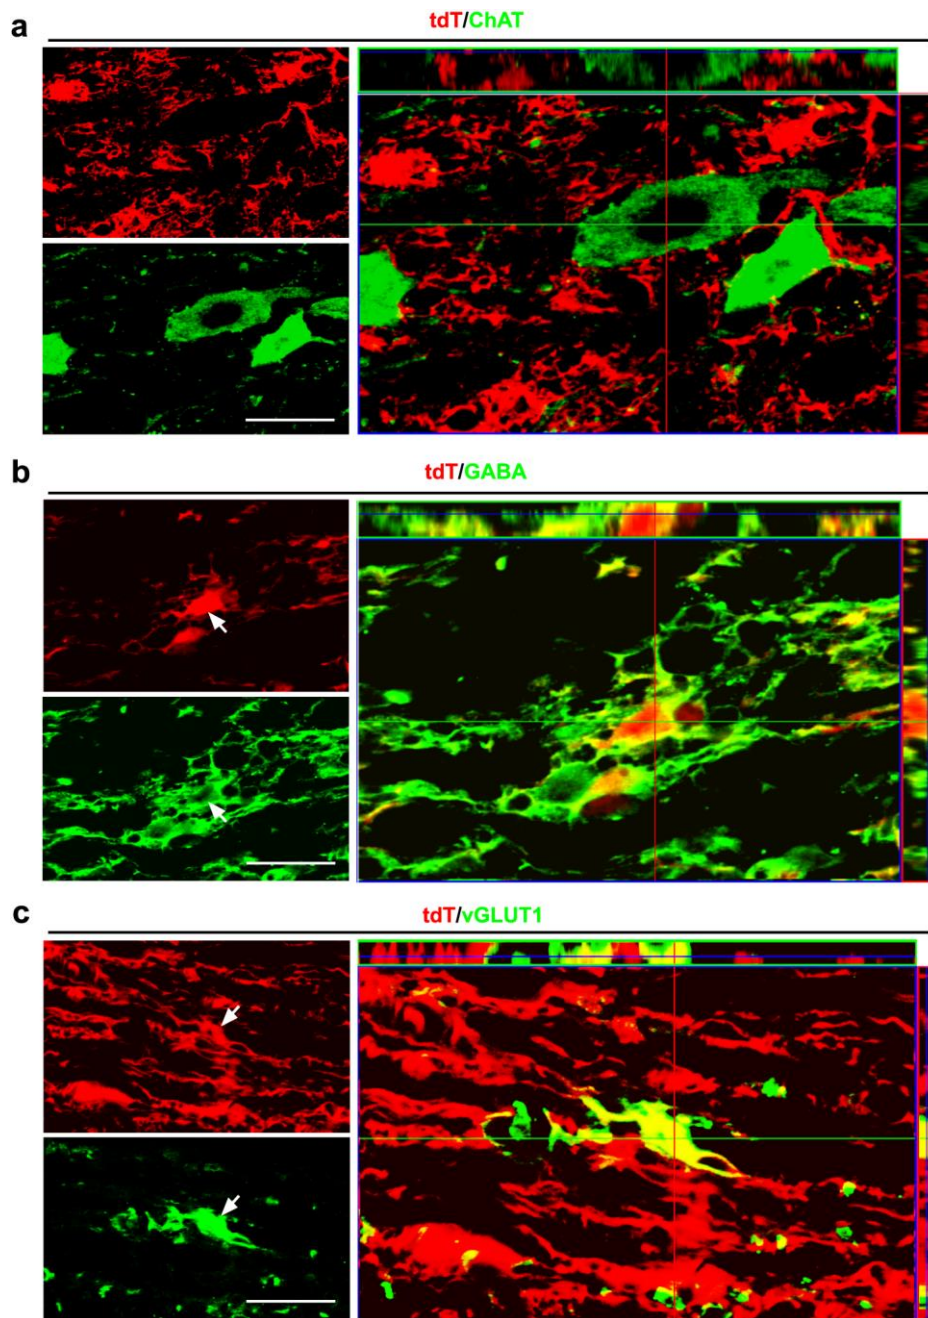

**Supplementary Figure 9. Subtype analysis of SOX2-induced neurons from astrocytes.** The spinal cords of adult *mGfap-Cre line 77.6;Rosa-tdT* mice were injected with *hGFAP-SOX2* or a control virus and examined at 8 wpi. (a) ChAT<sup>+</sup> motoneurons are not traced by tdT. (b-c) Ectopic SOX2 induces tdT-traced astrocytes to become GABA<sup>+</sup> (b) or vGLUT1<sup>+</sup> (c) neurons. Marker expression is also shown by orthogonal views in the right panels. Scales: 40  $\mu$ m.

**Supplementary Table 1. Primary antibodies used for immunohistochemistry**

| <b>Antibody</b>                              | <b>Host</b> | <b>Dilution</b> | <b>Source</b>            |
|----------------------------------------------|-------------|-----------------|--------------------------|
| GFP (Green fluorescent protein)              | Chick       | 1:600           | Aves Labs                |
| GFAP (Glial fibrillary acidic protein)       | Mouse       | 1:500           | Sigma                    |
| GS (Glutamine synthetase)                    | Mouse       | 1:500           | Chemicon                 |
| Olig2                                        | Rabbit      | 1:200           | Millipore                |
| NG2                                          | Rabbit      | 1:500           | Millipore                |
| NeuN                                         | Mouse       | 1:500           | Chemicon                 |
| Map-2                                        | Mouse       | 1:250           | Sigma                    |
| TUBB3 (betaIII-tubulin, also known as Tuj-1) | Mouse       | 1:1000          | Covance                  |
| TUBB3 (betaIII-tubulin, also known as Tuj-1) | Rabbit      | 1:500           | Covance                  |
| MBP (Myelin basic protein)                   | Mouse       | 1:1000          | Millipore                |
| PLP (Myelin proteolipid protein)             | Mouse       | 1:100           | Millipore                |
| Iba-1                                        | Rabbit      | 1:1000          | Wako                     |
| SSEA1 (stage-specific embryonic antigen 1)   | Mouse       | 1:100           | Lowa                     |
| Klf4 (Kruppel-like factor 4)                 | Goat        | 1:100           | R&D                      |
| Sox1 (Sex determining region Y-box 1)        | Rabbit      | 1:500           | Cell Signaling           |
| Sox2 (Sex determining region Y-box 2)        | Rabbit      | 1:500           | Millipore                |
| Sox3 (Sex determining region Y-box 3)        | Rabbit      | 1:500           | A gift of Dr. Klymkowsky |
| DCX (Doublecortin)                           | Goat        | 1:150           | Santa Cruz Biotechnology |
| BrdU (5-bromo-2-deoxyuridine)                | Rat         | 1:500           | Accurate Chemical        |
| Ki67                                         | Rabbit      | 1:500           | Novocastra               |
| GABA (Gamma aminobutyric acid)               | Rabbit      | 1:1000          | Sigma                    |
| vGlut1 (Vesicular glutamate transporter 1)   | Mouse       | 1:100           | UC Davis                 |
| GAD-6 (Glutamic acid decarboxylase 65)       | Mouse       | 1:100           | Hybridoma Bank           |
| ChAT (Choline acetyltransferase)             | Goat        | 1:200           | Chemicon                 |
| Synapsin-1                                   | Rabbit      | 1:100           | Cell Signaling           |
